# Supplementary material
Source: PubMed Central journal article supplement (PMC4068436)
Supplement: AAC.02799-13_zac006142875so1.pdf [file AAC.02799-13_zac006142875so1.pdf]

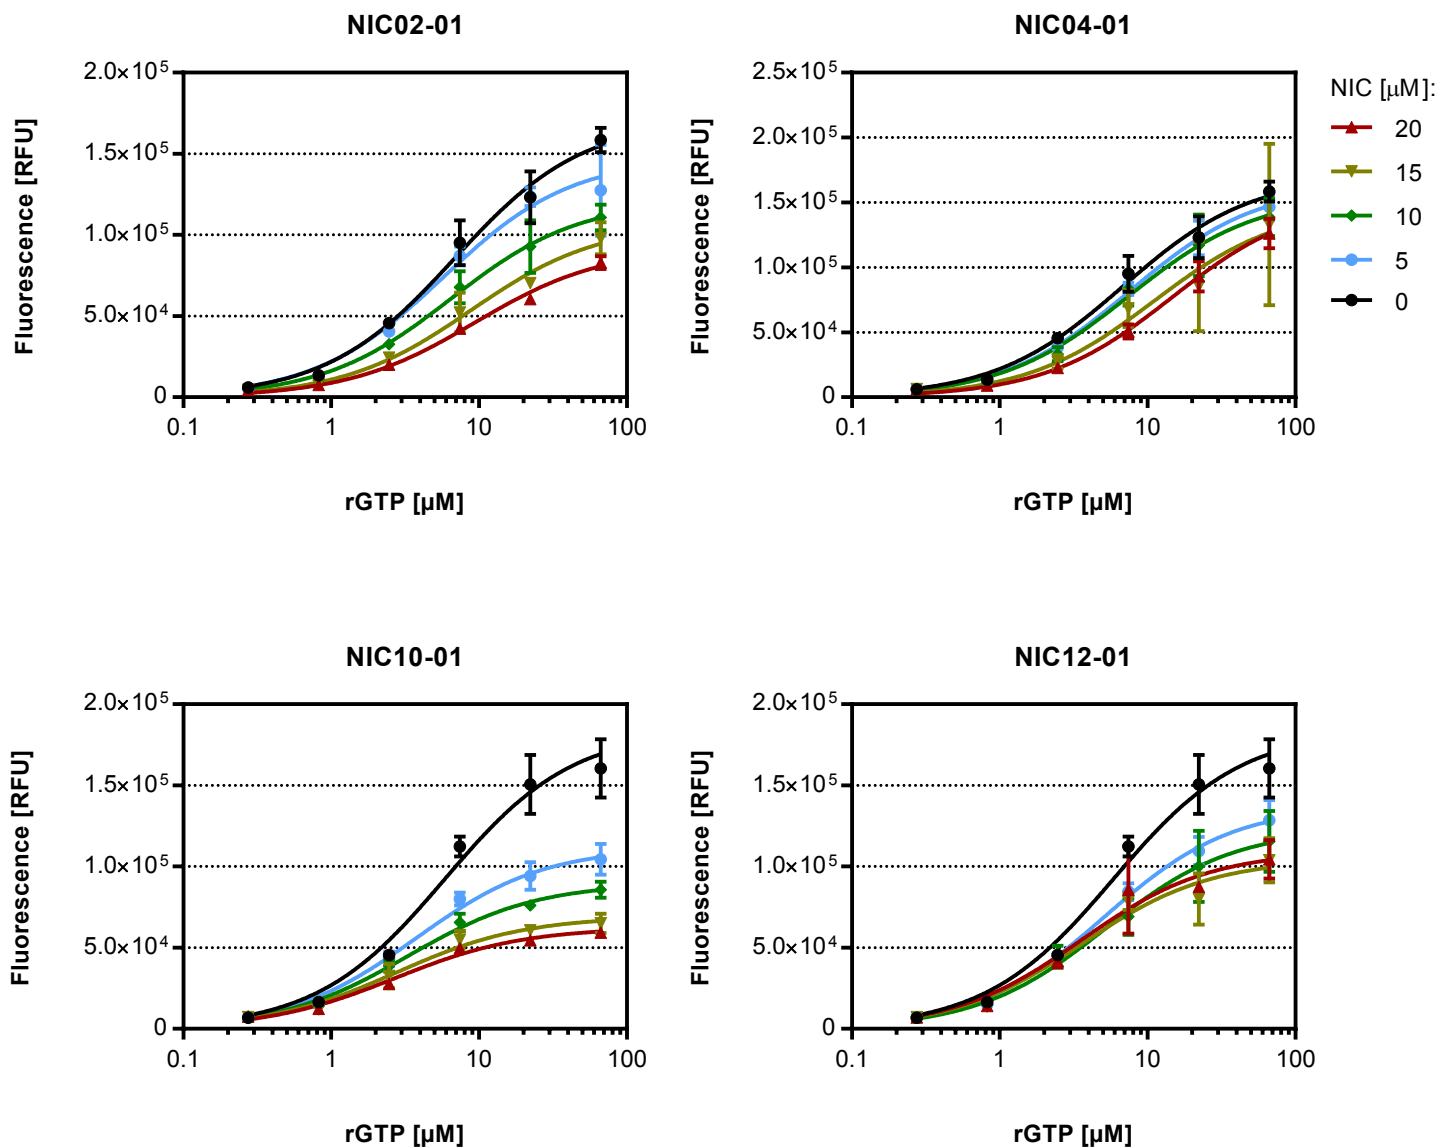

**Supplementary Figure 1. Kinetics of NoV GII.4 RdRp activity in the presence of NIC inhibitors.** The activity of the NoV RdRp was tested at various concentrations of GTP (substrate) and inhibitor. For each of the substrate concentrations (0.2 to 66  $\mu\text{M}$ ), the inhibitor concentration was also varied from 0 to 20  $\mu\text{M}$ . RdRp assays were performed in triplicate and presented as the average with standard deviations. The data was used to generate double reciprocal Lineweaver–Burk plots (Figure 3).

**Mock (DMSO)**

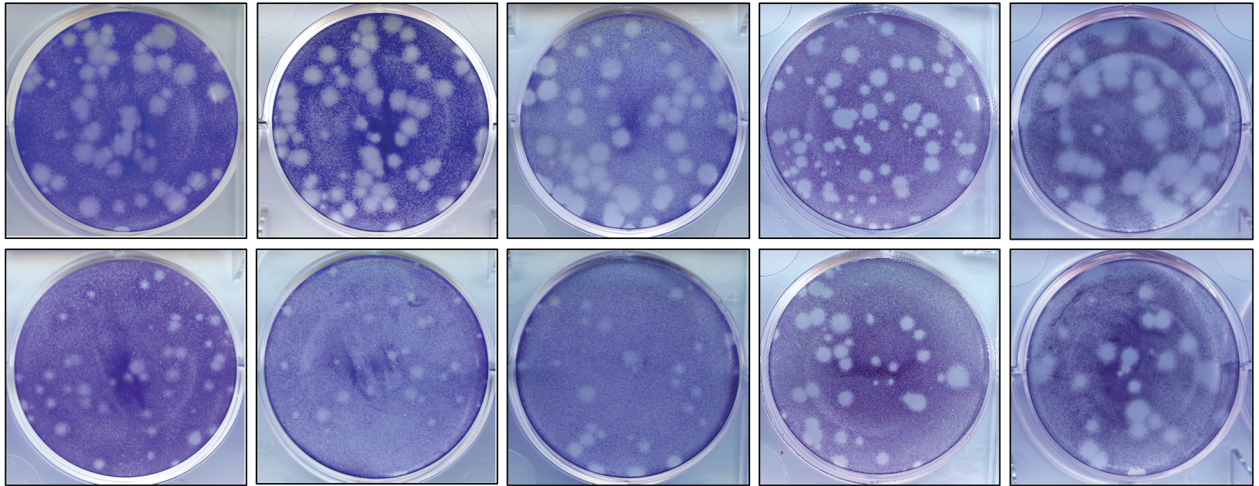

**2'-C-MeC (1 μM)**

**NIC02 (10 μM)**

**NIC04 (50 μM)**

**NIC10 (50 μM)**

**NIC12 (50 μM)**

**Supplementary Figure 2. MNV plaque reduction by lead NoV NNIs.** Plaque formation was visualised 48 h after treatment with different compounds and subsequent infection with MNV. Control wells for each experiment, treated with DMSO (vehicle), are shown in the top panel. Inhibitor treatment is shown in the bottom panel where compounds were used at a concentration that was not toxic to RAW 264.7 cells.

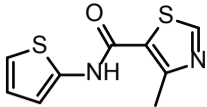

**C1**

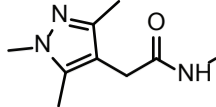

**C2**

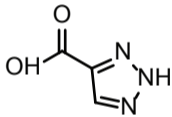

**C3**

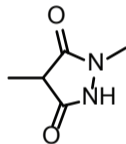

**C4**

**Supplementary Figure 3. Core structures used for SAR analysis.** Structures of the four leading compounds, without their functional groups, were used to identify analogue molecules from the compound library. These core structures are shown for NIC02 (C1), NIC04 (C2), NIC10 (C3) and NIC12 (C4).

**Supplementary Table 1. Inhibitory activity of NoV NNI analogues**

| Entry number | Structure                                                                           | Parent compound | NoV RdRp Inhibition [% of control]* |
|--------------|-------------------------------------------------------------------------------------|-----------------|-------------------------------------|
| NIC02        | 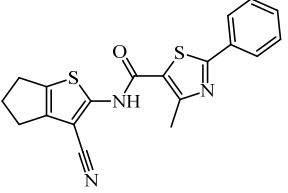   |                 | 64.1 ± 1.0                          |
| WECC-0147676 |    | NIC02           | 17.1 ± 0.4                          |
| WECC-0124682 |    | NIC02           | -1.6 ± 1.8                          |
| WECC-0000826 |    | NIC02           | -3.5 ± 4.5                          |
| NIC04        |   |                 | 30.4 ± 7.5                          |
| WECC-0121840 |  | NIC04           | 10.8 ± 16                           |
| WECC-0119984 |  | NIC04           | 9.8 ± 9.7                           |
| WECC-0155998 |  | NIC04           | 9.3 ± 0.8                           |
| WECC-0155058 |  | NIC04           | 8.0 ± 2.8                           |
| WECC-0129793 |  | NIC04           | 7.8 ± 9.2                           |
| WECC-0131157 |  | NIC04           | 7.5 ± 10.2                          |
| WECC-0130545 |  | NIC04           | 7.4 ± 1.0                           |

| Entry number | Structure | Parent compound | NoV RdRp Inhibition [% of control]* |
|--------------|-----------|-----------------|-------------------------------------|
| WECC-0159854 |           | NIC04           | 7.1 ± 4.0                           |
| WECC-0131506 |           | NIC04           | 6.8 ± 5.1                           |
| WECC-0133030 |           | NIC04           | 6.1 ± 8.6                           |
| WECC-0157421 |           | NIC04           | 5.8 ± 5.4                           |
| WECC-0155007 |           | NIC04           | 5.3 ± 3.4                           |
| WECC-0124111 |           | NIC04           | 5.2 ± 10.2                          |
| WECC-0151645 |           | NIC04           | 5.2 ± 4.2                           |
| WECC-0141628 |           | NIC04           | 5.0 ± 7.6                           |
| WECC-0135652 |           | NIC04           | 4.7 ± 13                            |
| WECC-0153396 |           | NIC04           | 4.6 ± 2.3                           |
| WECC-0132604 |           | NIC04           | 4.3 ± 6.1                           |

| Entry number | Structure | Parent compound | NoV RdRp Inhibition [% of control]* |
|--------------|-----------|-----------------|-------------------------------------|
| WECC-0136981 |           | NIC04           | 4.2 ± 6.7                           |
| WECC-0127545 |           | NIC04           | 4.0 ± 6.4                           |
| WECC-0127616 |           | NIC04           | 3.9 ± 9.0                           |
| WECC-0129123 |           | NIC04           | 3.8 ± 4.6                           |
| WECC-0145342 |           | NIC04           | 3.8 ± 4.6                           |
| WECC-0157113 |           | NIC04           | 3.6 ± 2.7                           |
| WECC-0153684 |           | NIC04           | 3.6 ± 5.3                           |
| WECC-0154797 |           | NIC04           | 3.5 ± 1.9                           |
| WECC-0088299 |           | NIC04           | 3.5 ± 9.5                           |
| WECC-0126967 |           | NIC04           | 3.3 ± 6.3                           |
| WECC-0084573 |           | NIC04           | 3.1 ± 7.4                           |
| WECC-0138117 |           | NIC04           | 3.0 ± 7.3                           |

| Entry number | Structure | Parent compound | NoV RdRp Inhibition [% of control]* |
|--------------|-----------|-----------------|-------------------------------------|
| WECC-0124815 |           | NIC04           | 2.9 ± 7.9                           |
| WECC-0138218 |           | NIC04           | 2.7 ± 16.3                          |
| WECC-0141598 |           | NIC04           | 2.6 ± 2.4                           |
| WECC-0158058 |           | NIC04           | 2.5 ± 7.8                           |
| WECC-0155892 |           | NIC04           | 2.1 ± 2.5                           |
| WECC-0124388 |           | NIC04           | 2.0 ± 2.8                           |
| WECC-0141334 |           | NIC04           | 2.0 ± 3.7                           |
| WECC-0154307 |           | NIC04           | 1.9 ± 2.5                           |
| WECC-0118923 |           | NIC04           | 1.7 ± 6.4                           |
| WECC-0087233 |           | NIC04           | 1.5 ± 12.0                          |
| WECC-0087236 |           | NIC04           | 1.1 ± 16.4                          |
| WECC-0152270 |           | NIC04           | 0.9 ± 10.8                          |

| Entry number | Structure                                                                           | Parent compound | NoV RdRp Inhibition [% of control]* |
|--------------|-------------------------------------------------------------------------------------|-----------------|-------------------------------------|
| WECC-0139047 | 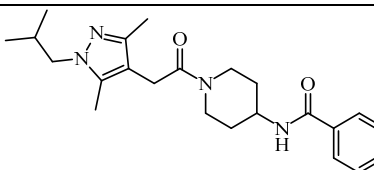   | NIC04           | 0.7 ± 11.8                          |
| WECC-0158431 |    | NIC04           | 0.7 ± 3.5                           |
| WECC-0114628 |    | NIC04           | 0.6 ± 7.3                           |
| WECC-0130765 |    | NIC04           | 0.5 ± 11.7                          |
| WECC-0129673 |   | NIC04           | 0.2 ± 7.1                           |
| WECC-0137813 |  | NIC04           | 0 ± 3.3                             |
| WECC-0148245 |  | NIC04           | 0 ± 0.8                             |
| WECC-0127985 |  | NIC04           | -0.3 ± 5.7                          |
| WECC-0157037 |  | NIC04           | -0.3 ± 5.3                          |
| WECC-0154971 |  | NIC04           | -0.3 ± 4.2                          |



| Entry number | Structure                                                                           | Parent compound | NoV RdRp Inhibition [% of control]* |
|--------------|-------------------------------------------------------------------------------------|-----------------|-------------------------------------|
| WECC-0138748 | 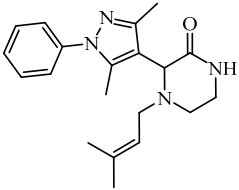   | NIC04           | -0.4 ± 2.0                          |
| WECC-0159453 |    | NIC04           | -0.5 ± 5.1                          |
| WECC-0127208 |    | NIC04           | -0.7 ± 6.4                          |
| WECC-0137534 |    | NIC04           | -0.7 ± 7.2                          |
| WECC-0087169 |   | NIC04           | -0.7 ± 5.5                          |
| WECC-0133646 |  | NIC04           | -0.8 ± 5.9                          |
| WECC-0004464 |  | NIC04           | -0.8 ± 5.9                          |
| WECC-0122129 |  | NIC04           | -0.9 ± 2.5                          |
| WECC-0140492 |  | NIC04           | -0.9 ± 2.7                          |
| WECC-0153988 |  | NIC04           | -1.0 ± 9.3                          |
| WECC-0087065 |  | NIC04           | -1.1 ± 3.5                          |

| Entry number | Structure | Parent compound | NoV RdRp Inhibition [% of control]* |
|--------------|-----------|-----------------|-------------------------------------|
| WECC-0136288 |           | NIC04           | -1.2 ± 4.4                          |
| WECC-0153838 |           | NIC04           | -1.2 ± 11.8                         |
| WECC-0121462 |           | NIC04           | -1.2 ± 6.4                          |
| WECC-0084669 |           | NIC04           | -1.7 ± 8.0                          |
| WECC-0138256 |           | NIC04           | -1.8 ± 1.3                          |
| WECC-0137579 |           | NIC04           | -2.0 ± 9.1                          |
| WECC-0130415 |           | NIC04           | -2.4 ± 5.4                          |
| WECC-0087067 |           | NIC04           | -2.5 ± 1.6                          |
| WECC-0143711 |           | NIC04           | -2.7 ± 5.0                          |
| WECC-0122543 |           | NIC04           | -2.7 ± 5.8                          |
| WECC-0152365 |           | NIC04           | -2.9 ± 4.3                          |
| WECC-0151606 |           | NIC04           | -3.0 ± 3.3                          |

| Entry number | Structure | Parent compound | NoV RdRp Inhibition [% of control]* |
|--------------|-----------|-----------------|-------------------------------------|
| WECC-0159049 |           | NIC04           | -3.1 ± 3.1                          |
| WECC-0154458 |           | NIC04           | -3.1 ± 3.2                          |
| WECC-0123651 |           | NIC04           | -3.4 ± 9.5                          |
| WECC-0149289 |           | NIC04           | -3.4 ± 4.0                          |
| WECC-0125513 |           | NIC04           | -3.4 ± 2.6                          |
| WECC-0084725 |           | NIC04           | -3.6 ± 7.9                          |
| WECC-0156093 |           | NIC04           | -3.9 ± 4.9                          |
| WECC-0147229 |           | NIC04           | -4.1 ± 5.1                          |
| WECC-0133556 |           | NIC04           | -4.2 ± 5.1                          |
| WECC-0086989 |           | NIC04           | -4.3 ± 5.9                          |
| WECC-0148560 |           | NIC04           | -4.3 ± 1.6                          |
| WECC-0158829 |           | NIC04           | -4.6 ± 4.7                          |
| WECC-0142703 |           | NIC04           | -4.7 ± 5.1                          |

| Entry number | Structure | Parent compound | NoV RdRp Inhibition [% of control]* |
|--------------|-----------|-----------------|-------------------------------------|
| WECC-0142013 |           | NIC04           | -5.1 ± 4.3                          |
| WECC-0003117 |           | NIC04           | -5.2 ± 3.1                          |
| WECC-0123846 |           | NIC04           | -5.2 ± 3.7                          |
| WECC-0151472 |           | NIC04           | -5.6 ± 3.0                          |
| WECC-0121988 |           | NIC04           | -5.6 ± 3.2                          |
| WECC-0149206 |           | NIC04           | -5.7 ± 6.0                          |
| WECC-0131954 |           | NIC04           | -6.3 ± 2.4                          |
| WECC-0086990 |           | NIC04           | -6.4 ± 2.0                          |
| WECC-0143716 |           | NIC04           | -6.4 ± 10.5                         |
| WECC-0087232 |           | NIC04           | -7.1 ± 8.2                          |
| WECC-0086991 |           | NIC04           | -7.3 ± 2.1                          |
| WECC-0147453 |           | NIC04           | -7.6 ± 0.8                          |
| WECC-0149778 |           | NIC04           | -8.5 ± 12.1                         |
| WECC-0145176 |           | NIC04           | -8.5 ± 9.7                          |

| Entry number | Structure | Parent compound | NoV RdRp Inhibition [% of control]* |
|--------------|-----------|-----------------|-------------------------------------|
| WECC-0150495 |           | NIC04           | -8.5 ± 1.1                          |
| WECC-0150513 |           | NIC04           | -8.5 ± 5.8                          |
| WECC-0149135 |           | NIC04           | -8.9 ± 4.0                          |
| WECC-0120518 |           | NIC04           | -9.1 ± 0.8                          |
| WECC-0087380 |           | NIC04           | -9.4 ± 8.3                          |
| WECC-0146702 |           | NIC04           | -10.4 ± 7.8                         |
| WECC-0143988 |           | NIC04           | -11.1 ± 5.8                         |
| WECC-0157612 |           | NIC04           | -11.4 ± 2.0                         |
| WECC-0144033 |           | NIC04           | -11.5 ± 2.4                         |
| WECC-0151320 |           | NIC04           | -13.5 ± 4.4                         |

| Entry number | Structure                                                                           | Parent compound | NoV RdRp Inhibition [% of control]* |
|--------------|-------------------------------------------------------------------------------------|-----------------|-------------------------------------|
| NIC10        | 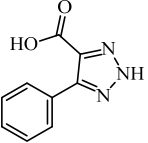   |                 | 41.2 ± 0.5                          |
| WECC-0029330 |    | NIC10           | 22.1 ± 13.2                         |
| WECC-0141606 |    | NIC10           | 15.5 ± 14.8                         |
| WECC-0159361 |    | NIC10           | 15.2 ± 18.2                         |
| WECC-0029329 |   | NIC10           | 12.5 ± 6.1                          |
| WECC-0029328 |  | NIC10           | 12.1 ± 16.4                         |
| WECC-0131788 |  | NIC10           | 11.7 ± 6.4                          |
| WECC-0022218 |  | NIC10           | 8.0 ± 4.5                           |
| WECC-0111306 |  | NIC10           | 7.4 ± 4.2                           |
| WECC-0029327 |  | NIC10           | 6.7 ± 11                            |

| Entry number | Structure | Parent compound | NoV RdRp Inhibition [% of control]* |
|--------------|-----------|-----------------|-------------------------------------|
| WECC-0007325 |           | NIC10           | 5.8 ± 10.9                          |
| WECC-0155904 |           | NIC10           | 5.2 ± 7.1                           |
| WECC-0007329 |           | NIC10           | 3.8 ± 2.8                           |
| WECC-0020694 |           | NIC10           | 3.5 ± 2.5                           |
| WECC-0000368 |           | NIC10           | 1.8 ± 7.9                           |
| WECC-0150391 |           | NIC10           | 1.8 ± 9.2                           |
| WECC-0140134 |           | NIC10           | 1.7 ± 3.2                           |
| WECC-0018094 |           | NIC10           | 1.6 ± 13.0                          |
| WECC-0115190 |           | NIC10           | 0.9 ± 1.2                           |
| WECC-0110971 |           | NIC10           | -0.2 ± 2.7                          |
| WECC-0017416 |           | NIC10           | -0.2 ± 5.4                          |
| WECC-0158809 |           | NIC10           | -0.7 ± 7.0                          |

| Entry number | Structure | Parent compound | NoV RdRp Inhibition [% of control]* |
|--------------|-----------|-----------------|-------------------------------------|
| WECC-0015626 |           | NIC10           | -1.0 ± 2.3                          |
| WECC-0020931 |           | NIC10           | -2.2 ± 5.2                          |
| WECC-0009462 |           | NIC10           | -3.0 ± 6.8                          |
| WECC-0007328 |           | NIC10           | -3.7 ± 5.3                          |
| WECC-0007327 |           | NIC10           | -4.4 ± 3.0                          |
| WECC-0007320 |           | NIC10           | -4.7 ± 3.0                          |
| WECC-0056532 |           | NIC10           | -7.0 ± 4.9                          |
| WECC-0019921 |           | NIC10           | -9.1 ± 1.2                          |
| WECC-0018026 |           | NIC10           | -10.5 ± 18                          |
| WECC-0144671 |           | NIC10           | -10.6 ± 5.4                         |
| WECC-0015501 |           | NIC10           | -14.2 ± 16                          |
| WECC-0003882 |           | NIC10           | -22.1 ± 13.7                        |



| Entry number | Structure                                                                           | Parent compound | NoV RdRp Inhibition [% of control]* |
|--------------|-------------------------------------------------------------------------------------|-----------------|-------------------------------------|
| NIC12        | 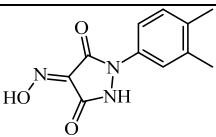   |                 | 47.8 ± 4.6                          |
| WECC-0056153 |    | NIC12           | 75.7 ± 1.2                          |
| WECC-0056152 |    | NIC12           | 61.8 ± 6.6                          |
| WECC-0041278 |    | NIC12           | 54.5 ± 5.0                          |
| WECC-0055263 |   | NIC12           | 35.2 ± 8.6                          |
| WECC-0037505 |  | NIC12           | 32.7 ± 11.6                         |
| WECC-0041308 |  | NIC12           | 32.0 ± 20.6                         |
| WECC-0041226 |  | NIC12           | 31.4 ± 6.1                          |
| WECC-0041162 |  | NIC12           | 30.3 ± 9.5                          |

| Entry number | Structure                                                                           | Parent compound | NoV RdRp Inhibition [% of control]* |
|--------------|-------------------------------------------------------------------------------------|-----------------|-------------------------------------|
| WECC-0041342 | 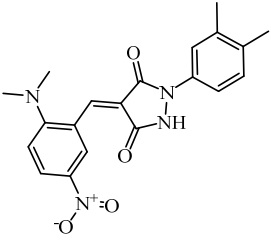   | NIC12           | 30.1 ± 7.0                          |
| WECC-0038991 |    | NIC12           | 28.7 ± 6.2                          |
| WECC-0036746 |    | NIC12           | 25.0 ± 2.5                          |
| WECC-0056747 |   | NIC12           | 24.2 ± 4.7                          |
| WECC-0038666 |  | NIC12           | 23.1 ± 4.8                          |
| WECC-0037742 |  | NIC12           | 22.8 ± 5.4                          |
| WECC-0041320 |  | NIC12           | 19.4 ± 9.5                          |
| WECC-0037399 |  | NIC12           | 18.4 ± 4.6                          |

| Entry number | Structure                                                                           | Parent compound | NoV RdRp Inhibition [% of control]* |
|--------------|-------------------------------------------------------------------------------------|-----------------|-------------------------------------|
| WECC-0041293 | 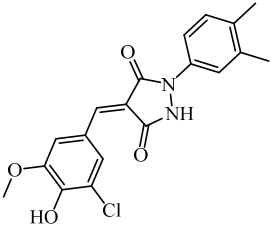   | NIC12           | 17.9 ± 0.0                          |
| WECC-0037895 |    | NIC12           | 17.7 ± 1.1                          |
| WECC-0041194 |    | NIC12           | 16.2 ± 7.8                          |
| WECC-0036860 |   | NIC12           | 15.9 ± 4.9                          |
| WECC-0038046 |  | NIC12           | 15.6 ± 5.5                          |
| WECC-0038578 |  | NIC12           | 13.4 ± 7.0                          |
| WECC-0056154 |  | NIC12           | 13.1 ± 3.3                          |
| WECC-0038695 |  | NIC12           | 12.4 ± 7.1                          |

| Entry number | Structure | Parent compound | NoV RdRp Inhibition [% of control]* |
|--------------|-----------|-----------------|-------------------------------------|
| WECC-0038714 |           | NIC12           | 12.3 ± 0.4                          |
| WECC-0028330 |           | NIC12           | 12.2 ± 4.9                          |
| WECC-0036826 |           | NIC12           | 11.7 ± 1.1                          |
| WECC-0038507 |           | NIC12           | 9.9 ± 9.1                           |
| WECC-0037083 |           | NIC12           | 8.5 ± 2.7                           |
| WECC-0038688 |           | NIC12           | 6.8 ± 4.3                           |
| WECC-0037573 |           | NIC12           | 4.7 ± 1.2                           |
| WECC-0046425 |           | NIC12           | 3.2 ± 8.8                           |

| Entry number | Structure                                                                         | Parent compound | NoV RdRp Inhibition [% of control]* |
|--------------|-----------------------------------------------------------------------------------|-----------------|-------------------------------------|
| WECC-0036872 | 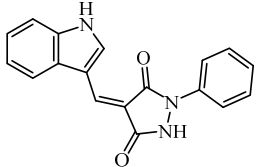 | NIC12           | 2.8 ± 4.4                           |
| WECC-0045626 |  | NIC12           | -1.7 ± 11.6                         |

\* Inhibition of the NoV GII.4 RdRp at a compound concentration of 10 μM
